# Supplementary material for: Characterization of a mGluR5 Knockout Rat Model with Hallmarks of Fragile X Syndrome
Source: MDPI journal article supplement (doi:10.3390/life12091308), 2022-08-25
Supplement: s1 [file s1]

## Supplemental Figures

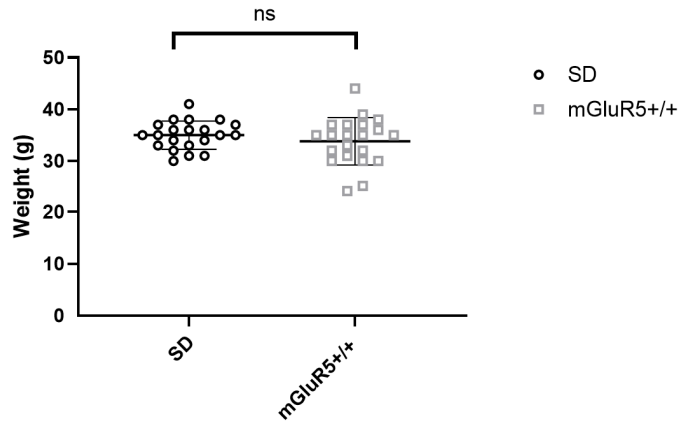

**Figure S1.** Total body weight in grams of mGluR5<sup>+/+</sup> (n=20) animals compared to SD control (n=21) animals for the P14 age group.

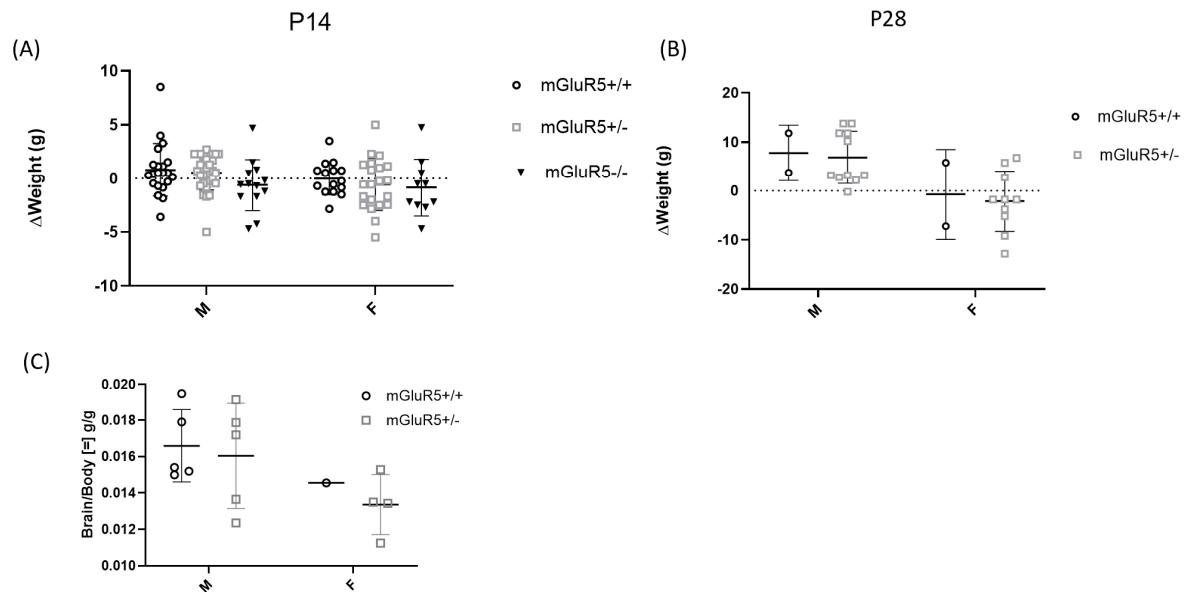

**Figure S2.** (A) Deviation from average litter matched body weight with sex comparison for P14 male mGluR5<sup>+/+</sup> (n=22), mGluR5<sup>+/-</sup> (n=37), mGluR5<sup>-/-</sup> (n=13), and female mGluR5<sup>+/+</sup> (n=15), mGluR5<sup>+/-</sup> (n=20), and mGluR5<sup>-/-</sup> (n=10) pups. (B) Deviation from average litter matched with sex comparison for P28 age group, male mGluR5<sup>+/+</sup> (n=2), male mGluR5<sup>+/-</sup> (n=12), female mGluR5<sup>+/+</sup> (n=2), and female mGluR5<sup>+/-</sup> (n=11). (C) Brain to body weight ratio comparing P14 male mGluR5<sup>+/+</sup> (n=5), male mGluR5<sup>+/-</sup> (n=5), female mGluR5<sup>+/+</sup> (n=1), and female mGluR5<sup>+/-</sup> (n=4) pups.
